# Supplementary material for: Patterns of morphological diversification are influenced by dietary evolution in a highly species-rich lizard radiation
Source: Frontiers journal article supplement (doi:10.3389/fevo.2024.1361799), 2024-04-04
Supplement: Table_1.XLSX [file Table_1.XLSX]

## Sheet: Hoja1
Species	F	M	SD/SVL	SD/HeLe	SD/HeWi	SD/FoLi	SD/HiLi	SD/AxGr	Location	Country	Sourse
Ctenoblepharys_adspersa	6	5	8.44844	2.02315	2.09293	6.37408	5.37014	5.1633	Hucho	Perú	Pincheira-Donoso, D.
Liolaemus_abaucan	0	1	n/d	n/d	n/d	n/d	n/d	n/d	n/d	Argentina	Meiri (2018)
Liolaemus_albiceps	3	4	4.74083	1.6918	1.65178	2.57765	3.24879	1.88466	Santa Rosa de Tastil, Nevado del Acay	Argentina	Pincheira-Donoso, D.
Liolaemus_alticolor	35	29	3.68709	0.682693	0.62987	1.36622	2.28752	2.42132	Chungara, Putre, Tiahuanaco, Zapahuira	Bolivia, Chile	Pincheira-Donoso, D.
Liolaemus_andinus	23	21	5.24513	1.30269	1.21219	2.8568	3.56205	2.88083	Camino al Tatio, Laguna Lejia, Salar de Quisquiro, Vados de Putana	Chile	Pincheira-Donoso, D.
Liolaemus_annectens	0	1	n/d	n/d	n/d	n/d	n/d	n/d	Caylloma and Sumbay	Perú	Holotype description
Liolaemus_anomalus	12	26	8.56863	2.08489	1.89204	2.61286	3.0414	4.86759	Bajada Ischigualasto, Bermejo, Desaguadero, Encon, Maipu	Argentina	Pincheira-Donoso, D.
Liolaemus_araucaniensis	0	3	5.65788	1.14727	0.906495	1.285	1.92723	3.69476	Cruzaco, Norte de Villarrica	Chile	Pincheira-Donoso, D.
Liolaemus_archeforus	33	37	6.22539	1.43319	1.38765	2.11955	3.4123	4.21499	Laguna Honda, Meseta Lago Buenos Aires	Argentina	Pincheira-Donoso, D.
Liolaemus_atacamensis	26	40	7.15431	1.69	1.6646	3.33917	5.84311	4.43369	Atacama, Copiapo, Diego de Almagro, El Salvador, Llano Tirado, Qda San Andres y Qda Tronquitos	Chile	Pincheira-Donoso, D.
Liolaemus_audituvelatus	13	26	3.78926	0.895821	0.927116	1.87476	2.17523	2.57925	Diego de Almagro, Caserón, Salar de Punta Negra	Chile	Pincheira-Donoso, D.
Liolaemus_austromendocinus	64	77	6.24578	1.57693	1.36672	2.24756	3.63191	3.84672	Payun, Nihuil, Alvarado, Auca Mahuida, Chachahuin, La Batalla, Los Molles, Malargue	Argentina	Pincheira-Donoso, D.
Liolaemus_azarai	0	1	n/d	n/d	n/d	n/d	n/d	n/d	Isla Yacyretá	Paraguay	Holotype description
Liolaemus_baguali	11	23	6.58165	1.91481	1.68091	2.24685	3.79612	3.59095	Tres Lagos, Meseta Cascajosa, Sierra Bagual	Argentina	Pincheira-Donoso, D.
Liolaemus_bellii	82	66	5.62294	1.12385	1.1618	2.21159	3.18675	4.15887	Cerro Provincia, Farellones, La Parva, Valle Rio San Francisco	Chile	Pincheira-Donoso, D.
Liolaemus_bibronii	80	68	4.1585	0.82141	0.683567	1.51677	2.4605	2.6801	Chile Chico, Collon-Cura, Esquel, Gastre, L. Perez, Las Heras, Laguna Blanca, Malargue, Meseta Somuncura	Argentina, Chile	Pincheira-Donoso, D.
Liolaemus_bitaeniatus	9	1	3.20058	0.468596	0.410182	0.828378	1.66051	2.77281	Sierra Medina	Argentina	Pincheira-Donoso, D.
Liolaemus_boulengeri	47	43	4.69814	0.975895	0.793566	1.79072	2.66329	2.72924	Cerro Corona, Esquel, Gastre, Jaramillo, Las Heras, Tecka	Argentina	Pincheira-Donoso, D.
Liolaemus_buergeri	35	25	8.78013	1.3949	1.34156	3.43336	4.16555	5.54683	Villa Hermosa, Paso Pehuenche, Termas El Azufre, Las Leñas, Altos de Lircay, Cajon Fierro, Copahue	Argentina, Chile	Pincheira-Donoso, D.
Liolaemus_burmeisteri	0	1	n/d	n/d	n/d	n/d	n/d	n/d	Caepe Malal	Argentina	Pincheira-Donoso, D.
Liolaemus_calchaqui	0	1	n/d	n/d	n/d	n/d	n/d	n/d	Punta de Agua-Tarapacá	Argentina	Meiri (2018)
Liolaemus_canqueli	27	41	8.17944	1.63468	1.39939	2.89139	4.56183	4.72923	Paso de Indios, Meseta el sombrero, Meseta canquel	Argentina	Pincheira-Donoso, D.
Liolaemus_capillitas	3	2	9.47658	2.51769	2.27781	2.64646	4.99434	3.42449	Cienaga Medanitos	Argentina	Pincheira-Donoso, D.
Liolaemus_chacabucoense	9	5	4.07157	1.11468	1.11625	1.66972	2.09422	2.4987	Lago Cochrane	Chile	Pincheira-Donoso, D.
Liolaemus_chacoensis	23	19	2.79776	0.515832	0.394421	1.32962	1.72011	2.32309	Caspi Corral, Catamarca, Chamical, Córdoba, El Quebrachal, Espada, Juarez, La Chañarienta	Argentina	Pincheira-Donoso, D.
Liolaemus_chaltin	1	1	2.23446	1.1738	0.53033	0.247487	1.96576	2.1496	n/d	Argentina	Pincheira-Donoso, D.
Liolaemus_chehuachekenk	0	2	0.169706	0.247487	0.282843	0.784889	1.32936	0.233345	n/d	Argentina	Pincheira-Donoso, D.
Liolaemus_chiliensis	55	57	10.3613	1.8131	1.57764	3.41283	5.45267	6.73775	Carriel Sur, Chompatal, Club Andino, Curanilahue, El Ingenio, El Pangue	Chile	Pincheira-Donoso, D.
Liolaemus_chillanensis	26	29	6.0153	1.59134	1.44321	2.48188	3.50042	3.14119	Laguna del Laja, Termas de Chillan	Chile	Pincheira-Donoso, D.
Liolaemus_coeruleus	37	39	3.71655	0.782908	0.834723	1.30138	1.9195	2.31389	Copahue, Paso Pino Hachado	Argentina, Chile	Pincheira-Donoso, D.
Liolaemus_confusus	4	7	5.48725	1.35666	0.810195	1.75418	2.49347	1.71446	Cerro Los Robles, Lolol	Chile	Pincheira-Donoso, D.
Liolaemus_constanzae	48	88	6.35336	1.4177	1.3369	2.33542	3.60827	3.17931	Cuesta Barros Arana, El Tatio, Peine, Quebrada Jerez, Rio Toconao, San Pedro de Atacama	Chile	Pincheira-Donoso, D.
Liolaemus_crandalli	0	1	n/d	n/d	n/d	n/d	n/d	n/d	Area Natural Protegida Auca Mahuida	Argentina	Holotype description
Liolaemus_crepuscularis	0	1	n/d	n/d	n/d	n/d	n/d	n/d	Mina Capillitas	Argentina	Holotype description
Liolaemus_cristiani	3	2	6.73249	1.89649	1.63261	2.30422	3.58816	1.77277	n/d	Chile	Pincheira-Donoso, D.
Liolaemus_curicensis	34	28	4.52483	1.10858	1.05986	1.38257	2.80375	2.56594	Pangal, El Teniente, Termas del Flaco	Chile	Pincheira-Donoso, D.
Liolaemus_curis	23	22	7.20524	1.62554	1.3908	2.51554	4.03018	4.01953	Termas del Flaco	Chile	Pincheira-Donoso, D.
Liolaemus_cuyanus	22	17	7.64374	1.62222	1.3837	3.25374	4.62405	4.03075	Carrizal del Medio, Depto Caucete, Depto Lavallo, Encon, La Rioja, Laguna Guanacache,	Argentina	Pincheira-Donoso, D.
Liolaemus_cuyumhue	0	1	n/d	n/d	n/d	n/d	n/d	n/d	Añelo Basin	Argentina	Holotype description
Liolaemus_cyanogaster	56	54	5.29877	0.834143	0.75658	1.952	3.29802	3.83239	San Juan, Amargos, Cerro Caracol, Chiloe, Contulmo, Quebrada de Macul	Chile	Pincheira-Donoso, D.
Liolaemus_darwinii	63	86	4.08189	0.934502	0.754356	1.38588	2.36194	2.79082	Agua Escondida, Auca Mahuida, Azufre, Camino Amblayo, Camino La Paz, Carrizal del Medio	Argentina	Pincheira-Donoso, D.
Liolaemus_dicktracyi	0	1	n/d	n/d	n/d	n/d	n/d	n/d	Portezuelo Blanco	Argentina	Holotype description
Liolaemus_donosobarrosi	1	0	n/d	n/d	n/d	n/d	n/d	n/d	Matancilla salt sandhills	Argentina	Holotype description
Liolaemus_dorbignyi	5	12	7.08347	1.6239	1.81578	1.97319	4.07562	3.40555	Jujuy	Argentina	Pincheira-Donoso, D.
Liolaemus_eleodori	35	20	6.48065	1.46059	1.36134	2.19758	3.03341	3.68123	Reserva San Guillermo, San Juan	Argentina	Pincheira-Donoso, D.
Liolaemus_elongatus	58	59	6.05468	1.31596	1.1869	2.15276	3.53298	3.61938	Zapala, Bajada Colorada, Bariloche, Rio Negro, Camino Primeros Pinos, Cerro Batea Mahuida, Chubut,	Argentina, Chile	Pincheira-Donoso, D.
Liolaemus_escarchadosi	29	41	6.2636	1.49782	1.17292	2.01512	2.92542	3.91152	Calafate, Cordon Los Escarchados, Laguna Los Escarchados, Monte Leon	Argentina	Pincheira-Donoso, D.
Liolaemus_espinozai	0	1	n/d	n/d	n/d	n/d	n/d	n/d	Campo El Arenal	Argentina	Holotype description
Liolaemus_etheridgei	0	1	n/d	n/d	n/d	n/d	n/d	n/d	Pocsi	Perú	Holotype description
Liolaemus_fabiani	24	27	6.84255	1.00004	1.04147	1.91768	2.81994	3.37196	San Pedro de Atacama	Chile	Pincheira-Donoso, D.
Liolaemus_famatinae	0	1	n/d	n/d	n/d	n/d	n/d	n/d	Sierra de Famatina	Argentina	Holotype description
Liolaemus_fitzgeraldi	2	4	3.43594	0.472035	0.511263	1.25384	1.78941	2.88327	n/d	Argentina	Pincheira-Donoso, D.
Liolaemus_fitzingerii	41	83	7.6988	1.61392	1.50484	2.72321	4.07292	4.80977	Chile Chico, Paso de Indio, Caleta Olivia, Camarones, Camino Meseta Canquel, Comandante Piedra Buena	Argentina, Chile	Pincheira-Donoso, D.
Liolaemus_fuscus	8	27	2.82767	0.765771	0.604889	1.43807	2.15075	1.72534	Cerro Abanico, Cerro Provincia, Pichidangui,	Chile	Pincheira-Donoso, D.
Liolaemus_gallardoi	11	18	9.76482	2.03488	1.91582	3.35956	4.82462	5.12949	Lago Belgrano, Meseta Aguila-Asador, Meseta La Siberia	Argentina	Pincheira-Donoso, D.
Liolaemus_goetschi	26	49	6.23669	1.33136	1.1218	2.26354	3.95036	3.23579	Bajo Gualicho, Peninsula Valdes, Puerto Madryn	Argentina	Pincheira-Donoso, D.
Liolaemus_gracilis	39	46	5.00338	0.982288	0.862902	1.67539	2.61556	2.98973	Agua Escondida, Alarcon, Bajada Colorada, Bajo Gualicho, Buenos Aires, Catriel	Argentina	Pincheira-Donoso, D.
Liolaemus_gravenhorstii	11	7	3.05146	0.764259	0.56369	1.43295	2.25984	2.75607	Maipo, Santiago	Chile	Pincheira-Donoso, D.
Liolaemus_grosseorum	7	1	4.14011	0.912371	0.76921	1.13196	1.87859	1.8116	La Pampa, Mendoza, Neuquen	Argentina	Pincheira-Donoso, D.
Liolaemus_gununakuna	0	1	n/d	n/d	n/d	n/d	n/d	n/d	La Amarga	Argentina	Holotype description
Liolaemus_hatcheri	32	52	5.10384	0.944311	0.984117	2.00635	3.02455	3.48818	Lago Belgrano, Meseta Aguila-Asador, Meseta La Siberia, Meseta Lago Guitarra	Argentina	Pincheira-Donoso, D.
Liolaemus_heliodermis	0	1	n/d	n/d	n/d	n/d	n/d	n/d	Tafi del Valle	Argentina	Holotype description
Liolaemus_hellmichi	19	19	5.44744	1.36634	1.23392	2.17991	4.23624	2.57899	Cerro Moreno, Quebrada La Chimba	Argentina	Pincheira-Donoso, D.
Liolaemus_hermannunezi	9	3	9.25653	1.56556	1.4089	4.36686	5.79545	4.36214	Los Barros, Coicon	Chile	Pincheira-Donoso, D.
Liolaemus_huacahuasicus	4	7	5.59832	1.60212	1.34901	2.05299	2.67688	2.64735	Hualinchay, Cumbres Calchaquies	Argentina	Pincheira-Donoso, D.
Liolaemus_inacayali	0	1	n/d	n/d	n/d	n/d	n/d	n/d	Ingeniero Jacobacci	Argentina	Holotype description
Liolaemus_insolitus	3	7	7.12605	1.22588	1.1595	2.03691	2.49969	3.57033	Inclan Alto	Perú	Pincheira-Donoso, D.
Liolaemus_irregularis	11	13	8.02738	2.04572	1.93507	4.1617	5.79211	3.66998	San Antonio de los Cobres, San Antonio de las Cabras	Argentina	Pincheira-Donoso, D.
Liolaemus_isabelae	6	13	6.5331	1.48468	1.38441	2.74096	4.82063	3.71328	Diego de Almagro Alto, La Coipa, Salar de Pedernales	Chile	Pincheira-Donoso, D.
Liolaemus_janequeoae	0	1	n/d	n/d	n/d	n/d	n/d	n/d	Laguna Verde	Chile	Holotype description
Liolaemus_kingii	32	44	9.01132	2.08993	1.92408	2.87727	4.18324	5.79593	FitzRoy, Comodoro Rivadavia, Esquel, Jaramillo, Lago Blanco, Laguna Madre e Hija, Los Tamariscos,Norte San Julian, Pedra Buena	Argentina	Pincheira-Donoso, D.
Liolaemus_kolengh	13	17	4.49645	0.612388	0.809629	1.54245	1.66411	4.04578	Jeinimeni Alto, Rio Zeballos	Argentina, Chile	Pincheira-Donoso, D.
Liolaemus_koslowskyi	34	56	4.77028	1.19903	1.06726	2.34068	3.39207	2.67353	Pituil, Catamarca, La Rioja	Argentina	Pincheira-Donoso, D.
Liolaemus_kriegi	89	68	9.89287	1.7833	1.6668	3.35168	5.03294	5.38296	El Maiten, Maquinchao, Chenqueniyen, Río Litran, Esquel, Las Bayas, Las Ovejas, Lonco-Luan, Los Barros	Argentina, Chile	Pincheira-Donoso, D.
Liolaemus_laurenti	13	13	3.30797	0.592467	0.509978	1.4127	1.66744	1.87134	Pituil, La Rioja, Los Baldecitos,	Argentina	Pincheira-Donoso, D.
Liolaemus_lavillai	0	1	n/d	n/d	n/d	n/d	n/d	n/d	Cuesta del Acay	Argentina	Holotype description
Liolaemus_leftrarui	0	1	n/d	n/d	n/d	n/d	n/d	n/d	Volcan Tolhuaca	Chile	Holotype description
Liolaemus_lemniscatus	97	125	3.62457	0.970768	0.700229	1.5744	2.88384	2.54751	Altos de Vilches, Cerro Provincial, Cobquecura, Curanilahue, Dichato, El Abanico, El Belloto, El Tabo, Hualqui	Chile	Pincheira-Donoso, D.
Liolaemus_leopardinus	32	37	5.03488	1.09824	0.972851	2.00937	2.72956	3.50512	Cerro Provincia, Cerro San Ramon, Farellones, La Parva	Chile	Pincheira-Donoso, D.
Liolaemus_lineomaculatus	25	36	5.16442	0.978054	1.00304	2.07946	4.13833	3.17312	Cerro Beltza, Chubut, El Portezuelo, Esquel, Lago Buenos Aires, Lago Tar, Meseta del Viento, Meseta La Siberia, Monte León	Argentina	Pincheira-Donoso, D.
Liolaemus_loboi	0	1	n/d	n/d	n/d	n/d	n/d	n/d	Intersección de rutas nacionales 237 y 231	Argentina	Holotype description
Liolaemus_lorenzmuelleri	5	15	8.43403	2.12407	1.94336	3.19236	5.56876	4.47046	Cordillera de Donana, Mina El Indio, Qda Campamento	Chile	Pincheira-Donoso, D.
Liolaemus_lutzae	0	1	n/d	n/d	n/d	n/d	n/d	n/d	Recreiro dos Bandeirantes	Brazil	Meiri (2018)
Liolaemus_magellanicus	23	35	4.43126	0.873135	0.823188	1.52096	1.95552	3.41722	Cabo Virgenes, Calafate, Cordon los Escarchados, Estancia Esperanza, Estancia Viscachas, Meseta del Viento, Rio Gallegos	Argentina	Pincheira-Donoso, D.
Liolaemus_maldonadae	6	11	9.49404	1.77079	1.27597	2.90798	4.81484	3.81195	Los Molles, Los Piuquenes	Chile	Pincheira-Donoso, D.
Liolaemus_mapuche	0	1	n/d	n/d	n/d	n/d	n/d	n/d	Paso de Indios	Argentina	Holotype description
Liolaemus_martorii	0	1	n/d	n/d	n/d	n/d	n/d	n/d	Las Grutas	Argentina	Holotype description
Liolaemus_melaniceps	0	2	9.57423	1.08894	1.06773	2.21324	2.60215	4.0093	Isla Chungungo	Chile	Pincheira-Donoso, D.
Liolaemus_melanops	9	29	6.28459	1.29635	1.11043	2.32017	4.07203	3.54746	Los Menucos, Quele-Cura, Cierrra Colorada	Argentina	Pincheira-Donoso, D.
Liolaemus_molinai	0	1	n/d	n/d	n/d	n/d	n/d	n/d	Farellones de Tara	Chile	Holotype description
Liolaemus_monticola	30	39	5.22203	1.20285	1.03794	2.03524	3.33937	2.68919	Cerro abanico, Cerro El Roble, Cerro Manquehue, Crro Provincia, Interior Pichidangui, Manzano, Pangal, Polpaico	Chile	Pincheira-Donoso, D.
Liolaemus_morenoi	0	3	10.1404	2.18515	1.6167	4.07573	6.42231	3.71872	n/d	Argentina	Pincheira-Donoso, D.
Liolaemus_multicolor	24	29	7.02706	3.46259	1.47731	2.15739	3.56344	3.65343	Abdra Pampa, Camino Nevado del Acay	Argentina	Pincheira-Donoso, D.
Liolaemus_multimaculatus	48	29	6.06513	1.35146	1.12148	2.2681	3.42757	3.41345	Cabo San Antonio, Estero Yuancho, General Lavalle, Idaromecu, Mar de Ajo, Necochea, Orense,Punta San Antonio, Ququen, Santa Teresita	Argentina	Pincheira-Donoso, D.
Liolaemus_neuquensis	23	20	3.18307	0.58606	0.545953	1.09642	1.6953	2.5943	Copahue	Argentina	Pincheira-Donoso, D.
Liolaemus_nigrocoeruleus	0	1	n/d	n/d	n/d	n/d	n/d	n/d	Barranquilla	Chile	Holotype description
Liolaemus_nigromaculatus	96	110	8.41741	1.96228	1.82543	2.87974	4.60211	4.97455	Algarrobal, Caldera, Huasco, Pan de Azucar, Playa Baratillo, Tongoy, Travesia	Chile	Pincheira-Donoso, D.
Liolaemus_nigroviridis	85	119	8.08609	2.01659	1.88579	2.86579	4.76574	3.80426	Camino Valle Nevado, Crerro Cantillana, Cerro El Roble, Cerro la Campana, Cerro Provincia, Los Amarillos, El Arrayan, El Volcan, La Parva, Farellones, Los Valdes,Quebrada de Macul	Chile	Pincheira-Donoso, D.
Liolaemus_nitidus	40	54	8.46565	1.79787	1.69525	3.23347	4.8566	4.40276	Baños Morales, Cerrillos de Tamalla, Cerro Abanico, Cerro Chena, Cerro Manquehue, Cerro Petaca, Cerro Provincia, Cerro San Ramon	Chile	Pincheira-Donoso, D.
Liolaemus_occipitalis	0	1	n/d	n/d	n/d	n/d	n/d	n/d	Rio Grande	Brazil	Holotype description
Liolaemus_olongasta	0	1	n/d	n/d	n/d	n/d	n/d	n/d	South of Villa Unión	Argentina	Meiri (2018)
Liolaemus_orientalis	0	1	n/d	n/d	n/d	n/d	n/d	n/d	Pilcomayo	Bolivia	Meiri (2018)
Liolaemus_ornatus	41	48	4.89733	1.15588	0.844917	1.73501	3.1168	3.12659	La Quiaca, Colchane, Yavi Pera	Argentina, Bolivia, Chile	Pincheira-Donoso, D.
Liolaemus_pagaburoi	1	0	n/d	n/d	n/d	n/d	n/d	n/d	Catamarca	Argentina	Pincheira-Donoso, D.
Liolaemus_parvus	13	13	6.04269	1.26337	1.14823	1.67005	3.58629	3.30358	Mendoza	Argentina	Pincheira-Donoso, D.
Liolaemus_paulinae	40	34	4.40806	0.735003	0.656216	1.56199	2.22748	3.67238	Calama	Chile	Pincheira-Donoso, D.
Liolaemus_petrophilus	24	25	7.59931	1.76188	1.46332	2.24759	3.95629	4.39634	Gastre, Jacobacci, Meseta Somuncura, Meseta Telsen, Rio Negro	Argentina	Pincheira-Donoso, D.
Liolaemus_pictus	161	136	4.99243	1.22249	1.05509	1.98687	2.87405	3.26633	Ancud, Bariloche, Chiloe, Cordillera de Nahuelbuta, Cruzaco, Desague, La Unión , LicanRay, Neltume, Neuquen, Osorno, Piedra del Aguila	Argentina, Chile	Pincheira-Donoso, D.
Liolaemus_platei	27	67	5.06774	1.19083	0.964723	1.91565	3.26568	2.68663	Algarrobal, Atacama, Caldera, Bahia Inglesa, Huasco, Isla Pan de Azucar, Las Tacas, La Serena, Paihuano, Quebrada Paposo, Quebrada Los Leones	Chile	Pincheira-Donoso, D.
Liolaemus_poconchilensis	2	4	6.31072	1.55668	1.4131	2.2105	3.33864	2.33019	Between Azapa & Lluta	Chile	Pincheira-Donoso, D.
Liolaemus_poecilochromus	0	1	n/d	n/d	n/d	n/d	n/d	n/d	Los Nacimientos	Argentina	Meiri (2018)
Liolaemus_polystictus	0	1	n/d	n/d	n/d	n/d	n/d	n/d	Santa Inez	Perú	Holotype description
Liolaemus_pseudoanomalus	5	8	4.67365	0.932873	1.19123	2.13448	1.78201	2.28265	Aimogasta, Chilecito, San Agustín	Argentina	Pincheira-Donoso, D.
Liolaemus_pseudolemniscatus	1	1	4.15072	1.27986	0.883883	1.88798	2.58801	2.03647	n/d	Chile	Pincheira-Donoso, D.
Liolaemus_puna	4	2	2.90326	0.275421	0.539246	0.929121	1.07295	1.74468	Salta,San Pedro de Atacama	Argentina, Chile	Pincheira-Donoso, D.
Liolaemus_punmahuida	0	1	n/d	n/d	n/d	n/d	n/d	n/d	Volcan Tromen	Argentina	Holotype description
Liolaemus_quilmes	17	13	4.76071	1.05458	0.921382	1.39259	2.45001	2.2379	Animana, Catamarca, Santa Maria	Argentina	Pincheira-Donoso, D.
Liolaemus_ramirezae	1	0	n/d	n/d	n/d	n/d	n/d	n/d	Ruta Provincial 307	Argentina	Holotype description
Liolaemus_riojanus	6	13	4.08063	0.912869	0.641719	1.95936	2.91518	1.86414	Marayes, Encon, Los Baldecitos	Argentina	Pincheira-Donoso, D.
Liolaemus_robertmertensi	1	2	2.78751	0.494099	0.228983	1.1576	1.20683	4.6827	n/d	Argentina	Pincheira-Donoso, D.
Liolaemus_rothi	36	39	8.18108	1.78201	1.62647	2.52391	3.92898	4.96307	Jacobacci, La Esperanza, Las Bayas, Meseta Somuncura, Meseta Telsen, Moligue	Argentina	Pincheira-Donoso, D.
Liolaemus_ruibali	50	40	3.1139	0.927657	0.856554	1.81861	2.89149	2.09414	Uspallata	Argentina	Pincheira-Donoso, D.
Liolaemus_sagei	10	8	8.46268	1.75208	1.47335	3.35755	4.51959	4.35782	Collon-Cura, Paso Limay, Piedra Pintada, Laguna Blanca	Argentina	Pincheira-Donoso, D.
Liolaemus_salinicola	2	2	8.38949	2.17995	1.20579	2.75436	6.09926	3.70938	Medanitos	Argentina	Pincheira-Donoso, D.
Liolaemus_sarmientoi	51	42	6.51074	1.60745	1.42591	2.39055	2.92083	3.99855	Perito Moreno, Chimea-Aike, Cordon los Escarchados, Estancia Guarumba, Monte Aymond, Rio Gallegos	Argentina, Chile	Pincheira-Donoso, D.
Liolaemus_saxatilis	7	6	4.92878	2.00026	0.627491	1.75934	2.28978	3.79945	Achiras	Argentina	Pincheira-Donoso, D.
Liolaemus_scapularis	19	22	6.82399	1.73297	1.25987	2.19697	3.54372	2.92527	Catamarca	Argentina	Pincheira-Donoso, D.
Liolaemus_schroederi	53	47	4.83306	0.849468	0.799462	2.55012	3.88421	3.51283	Altos de Vilches, Coliumo (Interior Pichidangui), Curanilahue, Florida, Hualqui, Penco-Lirquen, Quebrada de Macul, Ramadillas, Rio Andalien, Termas del flaco	Chile	Pincheira-Donoso, D.
Liolaemus_scorialis	0	1	n/d	n/d	n/d	n/d	n/d	n/d	Volcan Antuco	Chile	Holotype description
Liolaemus_senguer	0	1	n/d	n/d	n/d	n/d	n/d	n/d	Alto Río Senguer	Argentina	Holotype description
Liolaemus_septentrionalis	0	1	n/d	n/d	n/d	n/d	n/d	n/d	Altos de Vilches	Chile	Meiri (2018)
Liolaemus_signifer	0	1	n/d	n/d	n/d	n/d	n/d	n/d	Chile	Chile	Cei et al. (1980)
Liolaemus_silvai	3	1	4.46492	1.38424	0.794754	2.08454	3.14325	2.97651	n/d	Chile	Pincheira-Donoso, D.
Liolaemus_silvanae	27	31	8.35433	1.29471	1.38559	3.09232	3.97983	4.50836	Meseta Lago Buenos Aires	Argentina	Pincheira-Donoso, D.
Liolaemus_sitesi	0	1	n/d	n/d	n/d	n/d	n/d	n/d	Park Ranger Post	Argentina	Holotype description
Liolaemus_somuncurae	13	18	5.83499	1.41023	1.51327	1.74584	2.89125	3.42087	Corona, Meseta Somuncura	Argentina	Pincheira-Donoso, D.
Liolaemus_stolzmanni	3	5	4.9253	1.34901	1.54845	2.23935	3.00916	1.20103	Hochpera, Hornitos	Chile	Pincheira-Donoso, D.
Liolaemus_tari	45	45	8.58691	2.03781	1.84133	3.04644	5.6535	4.50783	Lago Tar, Meseta del Moro, Meseta del Viento, Lago Viedma	Argentina	Pincheira-Donoso, D.
Liolaemus_tehuelche	0	1	n/d	n/d	n/d	n/d	n/d	n/d	Cerro Alto	Argentina	Holotype description
Liolaemus_telsen	5	13	3.96918	0.93771	0.760984	1.19006	2.52499	2.15772	Meseta Telsen	Argentina	Pincheira-Donoso, D.
Liolaemus_tenuis	157	168	3.74185	1.02249	0.917236	1.71403	2.63644	2.66368	Altos de Vilches, Antuco, Cerro Abanico, Cerro Caracol, Cerro la Campana , Cerro Provincia, Concepción, Contulmo, El Abanico, Curanilahue, Hualqui, LicanRay, Los Vilos	Chile	Pincheira-Donoso, D.
Liolaemus_torresi	4	4	3.36374	0.688237	0.493687	0.613862	1.35865	3.43314	calama	Chile	Pincheira-Donoso, D.
Liolaemus_tregenzai	10	10	7.03604	1.50977	1.43616	2.25896	3.24697	3.39827	Termas de Copahue	Argentina	Pincheira-Donoso, D.
Liolaemus_tristis	18	19	5.48373	1.73645	1.43007	1.85637	3.09303	2.83375	Meseta Laguna Sin Fondo	Argentina	Pincheira-Donoso, D.
Liolaemus_umbrifer	0	1	n/d	n/d	n/d	n/d	n/d	n/d	Quebrada de Randolfo	Argentina	Holotype description
Liolaemus_uniformis	0	1	n/d	n/d	n/d	n/d	n/d	n/d	Laguna Chepical	Chile	Holotype description
Liolaemus_uptoni	0	1	n/d	n/d	n/d	n/d	n/d	n/d	Bajada del Buey	Argentina	Holotype description
Liolaemus_uspallatensis	6	10	2.5646	0.777652	0.68232	1.41297	4.0622	1.7545	Uspallata	Argentina	Pincheira-Donoso, D.
Liolaemus_valdesianus	22	19	4.06776	0.892514	0.876308	1.68507	2.77421	3.24208	Lo Valdes	Chile	Pincheira-Donoso, D.
Liolaemus_vallecurensis	2	3	7.60133	1.98121	1.58375	2.6923	4.54787	3.92944	Valle del Cura	Argentina	Pincheira-Donoso, D.
Liolaemus_velosoi	28	42	4.26023	1.10014	1.03666	2.15582	4.46508	1.90486	Atacama, Copiapo, Diego de Almagro, Vega San Andrés	Chile	Pincheira-Donoso, D.
Liolaemus_villaricensis	11	20	6.19535	n/d	n/d	n/d	n/d	n/d	Volcan Villarrica	Chile	Pincheira-Donoso, D.
Liolaemus_walkeri	3	4	4.9295	0.927112	0.898948	1.41842	1.58467	2.65356	Las Vegas	Perú	Pincheira-Donoso, D.
Liolaemus_wiegmannii	48	38	4.21288	0.909844	0.682815	1.53872	2.22832	2.57334	Bahia Blanca, Carmen de Patagones, Entre Rios, La Pampa, Mendoza, Montevideo, San Luis, Sierra Medina	Argentina, Uruguay	Pincheira-Donoso, D.
Liolaemus_xanthoviridis	12	29	9.70251	1.71695	1.55365	3.86649	4.55835	5.25594	Las Plumas, Bosque Petrificado, Dos Pozos, Escalante, Sur de Rawson, Trelew	Argentina	Pincheira-Donoso, D.
Liolaemus_yanalcu	0	1	n/d	n/d	n/d	n/d	n/d	n/d	Acay	Argentina	Holotype description
Liolaemus_zabalai	0	1	n/d	n/d	n/d	n/d	n/d	n/d	Los Barros	Chile	Holotype description
Liolaemus_zapallarensis	35	58	11.7651	2.88553	2.50328	4.11333	6.72056	5.33537	Isla de Lobos, Isla Locos, Los Molles, Los Vilos, Maitencillo, Morrillos, Zapallar	Chile	Pincheira-Donoso, D.
Liolaemus_zullyae	15	32	6.83927	1.75894	1.50846	2.36011	4.1139	3.71621	Jeinimeni, Rio Zeballos	Argentina, chile	Pincheira-Donoso, D.
Phymaturus_aguedae	0	1	n/d	n/d	n/d	n/d	n/d	n/d	Cerro Provincia	Chile	Holotype description
Phymaturus_antofagastensis	17	21	5.1572	n/d	n/d	n/d	n/d	n/d	Oeste de Catamarca	Argentina	Pincheira-Donoso, D.
Phymaturus_bibronii	4	7	4.23378	2.35546	1.32836	2.70622	2.55699	4.887	valle Los Piuquenes	Chile	Pincheira-Donoso, D.
Phymaturus_calcogaster	4	5	4.7943	0.964077	1.06158	1.19315	2.96456	4.6992	entre Esquel y Leleque	Argentina	Pincheira-Donoso, D.
Phymaturus_ceii	21	14	3.86553	1.06017	0.531578	1.70382	2.33112	3.31855	Chasicó	Argentina	Pincheira-Donoso, D.
Phymaturus_delheyi	0	1	n/d	n/d	n/d	n/d	n/d	n/d	Volcan Tromen	Argentina	Holotype description
Phymaturus_denotatus	1	0	n/d	n/d	n/d	n/d	n/d	n/d	Laguna Blanca	Argentina	Holotype description
Phymaturus_dorsimaculatus	0	1	n/d	n/d	n/d	n/d	n/d	n/d	Copahue	Argentina	Holotype description
Phymaturus_extrilidus	0	1	n/d	n/d	n/d	n/d	n/d	n/d	Sierra La Invernada	Argentina	Holotype description
Phymaturus_indistinctus	5	2	4.78952	1.35453	0.811231	1.28693	2.37126	4.14884	Lago Musters	Argentina	Pincheira-Donoso, D.
Phymaturus_mallimaccii	3	2	7.97496	n/d	n/d	n/d	n/d	n/d	Cueva de Perez	Argentina	Holotype description, Pincheira-Donoso, D.
Phymaturus_manuelae	3	5	7.63384	1.88296	1.23397	1.89887	4.91732	5.03897	Comallo	Argentina	Pincheira-Donoso, D.
Phymaturus_maulense	3	7	4.32558	1.13314	1.44564	2.54261	2.89482	3.72483	Vilches Alto	Chile	Pincheira-Donoso, D.
Phymaturus_nevadoi	5	7	7.18207	0.834827	1.0011	n/d	n/d	n/d	Agua de la India	Argentina	Pincheira-Donoso, D.
Phymaturus_palluma	11	14	4.79745	1.08737	1.3717	3.16118	4.48898	3.16266	Central Chile	Chile	Pincheira-Donoso, D.
Phymaturus_patagonicus	10	11	3.90834	0.755362	0.958123	1.61542	2.79599	2.35425	Territorio del Chubut	Argentina	Pincheira-Donoso, D.
Phymaturus_payuniae	6	3	3.00116	0.355121	n/d	n/d	n/d	n/d	Volcan Payun	Argentina	Pincheira-Donoso, D.
Phymaturus_punae	7	6	6.56867	1.19556	1.28945	2.87716	4.23528	4.87159	Prov. de San Guillermo	Argentina	Pincheira-Donoso, D.
Phymaturus_roigorum	34	40	5.58321	n/d	n/d	n/d	n/d	n/d	Puesto Rojas	Argentina	Holotype description, Pincheira-Donoso, D.
Phymaturus_sitesi	0	1	n/d	n/d	n/d	n/d	n/d	n/d	Sierra de Auca Mahuida	Argentina	Holotype description
Phymaturus_somuncurensis	10	10	3.62397	0.489731	0.587746	1.66647	2.38863	3.43708	Laguna Raimundo	Argentina	Pincheira-Donoso, D.
Phymaturus_spurcus	59	49	5.78171	1.27273	1.13361	2.15006	3.39181	4.52152	Huanuluan	Argentina	Pincheira-Donoso, D.
Phymaturus_tenebrosus	9	2	8.18319	1.05192	1.31516	2.40242	3.10428	5.06783	Cerro Alto	Argentina	Pincheira-Donoso, D.
Phymaturus_verdugo	7	4	8.71787	1.38162	1.5358	3.74629	5.63367	6.55381	Río Grande	Argentina	Pincheira-Donoso, D.
Phymaturus_videlai	6	4	14.0191	1.64114	1.63372	4.52142	5.13835	8.01075	Buen Pasto	Argentina	Pincheira-Donoso, D.
Phymaturus_vociferator	8	10	6.36878	1.29477	1.45294	2.4745	3.53752	4.53443	El Refugio	Chile	Pincheira-Donoso, D.
Phymaturus_williamsi	0	1	n/d	n/d	n/d	n/d	n/d	n/d	Quebrada vallecito	Argentina	Holotype description
Phymaturus_zapalensis	27	28	4.66293	n/d	n/d	n/d	n/d	n/d	Zapala	Argentina	Holotype description, Pincheira-Donoso, D.
