# Supplementary material for: Patterns of morphological diversification are influenced by dietary evolution in a highly species-rich lizard radiation
Source: Frontiers journal article supplement (doi:10.3389/fevo.2024.1361799), 2024-04-04
Supplement: Table_2.XLSX [file Table_2.XLSX]

## Sheet: Hoja1
Species	SVL	HeLe	HeWi	FoLi	HiLi	DiLi	AxGr	Diet
Ctenoblepharys_adspersa	64.2707	14.7457	13.0597	26.855	44.575	17.72	29.915	Insectivore
Liolaemus_abaucan	65	-	-	-	-	-	-	Omnivora
Liolaemus_albiceps	71.1404	14.8583	12.7112	27.9458	43.3158	15.37	32.9508	Herbivore
Liolaemus_alticolor	47.3376	9.87896	8.0254	16.8909	27.0399	1.14923	20.7261	Omnivora
Liolaemus_andinus	62.2735	13.0957	11.5593	25.1964	36.4905	11.2946	28.6419	Omnivora
Liolaemus_annectens	86	19	15	28	46	2	67	Omnivora
Liolaemus_anomalus	64.0245	15.2856	14.043	29.3867	43.0067	13.62	31.0533	Insectivore
Liolaemus_araucaniensis	54.4333	12.4967	9.42333	20.6767	31.4833	1.86667	21.8733	Omnivora
Liolaemus_archeforus	81.3621	16.2298	13.5527	29.0637	44.044	14.9829	39.1701	Omnivora
Liolaemus_atacamensis	62.4779	13.3353	11.1675	23.6473	38.8214	15.1741	28.1401	Insectivore
Liolaemus_audituvelatus	51.8806	12.1588	10.6951	25.7923	35.2929	9.55769	22.2387	Insectivore
Liolaemus_austromendocinus	87.9126	18.8475	15.3753	33.9392	52.6457	18.7653	37.9643	Insectivore
Liolaemus_azarai	47.8	11	8.4	17.5	28.7	11.2	20	Insectivore
Liolaemus_baguali	84.266	17.1207	14.6672	30.2787	44.6649	14.3862	39.3433	Insectivore
Liolaemus_bellii	70.6819	14.3683	12.6711	26.1612	40.7241	14.5629	32.7434	Omnivora
Liolaemus_bibronii	53.5991	10.6018	8.72958	18.7993	29.8376	11.383	24.7127	Insectivore
Liolaemus_bitaeniatus	47.9244	9.98111	7.67556	18.3583	28.7444	1.38611	21.3067	Insectivore
Liolaemus_boulengeri	61.0029	12.3552	10.1839	22.2684	36.0703	13.8192	27.6255	Insectivore
Liolaemus_buergeri	92.6675	17.9631	15.8969	34.7402	50.3531	15.6129	43.9302	Omnivora
Liolaemus_burmeisteri	85.2	19.2	16.6	-	-	-	-	Insectivore
Liolaemus_calchaqui	60	-	-	-	-	-	-	Omnivora
Liolaemus_canqueli	85.1162	16.4521	13.5251	32.7233	49.8522	17.1289	39.4045	Omnivora
Liolaemus_capillitas	71.2833	15.2808	12.6167	28.7425	45.1067	16.3642	30.2892	Insectivore
Liolaemus_chacabucoense	59.4059	12.4593	10.1186	21.9757	32.1729	1.19722	28.4823	Insectivore
Liolaemus_chacoensis	45.088	10.0189	8.22001	18.0396	28.2028	1.16324	19.9612	Insectivore
Liolaemus_chaltin	56.57	11.48	9.875	19.895	31.71	11.815	25.01	Omnivora
Liolaemus_chehuachekenk	99.03	18.885	16.16	35.095	52.5	17.45	47.875	Omnivora
Liolaemus_chiliensis	84.3085	16.9807	13.5386	30.0845	46.5076	16.4231	39.694	Insectivore
Liolaemus_chillanensis	69.9169	15.3916	12.3703	28.8531	45.2429	16.3898	29.9208	Omnivora
Liolaemus_coeruleus	59.8768	11.9887	10.5799	23.5208	34.6868	11.1664	27.2887	Insectivore
Liolaemus_confusus	54.2404	12.4195	9.75339	19.0012	31.4046	12.4333	23.5554	Insectivore
Liolaemus_constanzae	63.039	13.204	11.0045	23.8958	37.9039	14.8882	28.5788	Omnivora
Liolaemus_crandalli	93.4	20.6	15.9	-	-	-	-	Omnivora
Liolaemus_crepuscularis	64.1	12.4	10.5	-	-	-	-	Omnivora
Liolaemus_cristiani	72.72	15.5333	13.6042	26.77	40.22	13.45	32.9183	Omnivora
Liolaemus_curicensis	56.7554	12.1013	9.90159	19.826	32.7756	12.9496	26.0777	Insectivore
Liolaemus_curis	89.7794	19.1702	16.353	35.1765	55.0168	19.8433	39.9938	Insectivore
Liolaemus_cuyanus	77.5639	16.3598	13.4751	30.6014	46.8637	16.2623	35.4965	Omnivora
Liolaemus_cuyumhue	61.7	12.9	10.8	-	-	-	-	Insectivore
Liolaemus_cyanogaster	59.9352	12.5503	9.84339	24.8661	38.9686	14.1256	27.6267	Insectivore
Liolaemus_darwinii	55.8291	11.7824	9.79596	21.7918	34.7393	12.9475	25.1743	Insectivore
Liolaemus_dicktracyi	92	19.6	15.4	-	-	-	-	Insectivore
Liolaemus_donosobarrosi	65	14.5	11.5	-	-	-	-	Insectivore
Liolaemus_dorbignyi	89.9881	18.3101	16.918	33.8398	50.3411	16.5133	41.0332	Omnivora
Liolaemus_eleodori	65.6431	13.702	12.1652	25.6672	37.257	11.5898	29.4537	Omnivora
Liolaemus_elongatus	78.4629	16.2529	13.3105	30.4155	47.2211	16.856	34.3329	Omnivora
Liolaemus_escarchadosi	79.3892	16.1733	13.3029	27.8152	42.4345	14.6194	38.1883	Insectivore
Liolaemus_espinozai	62.8	12.9	11.6	-	-	-	-	Insectivore
Liolaemus_etheridgei	70	16.9	12.5	-	-	-	-	Omnivora
Liolaemus_fabiani	74.8325	15.9026	12.7654	30.382	43.3234	12.9415	32.733	Omnivora
Liolaemus_famatinae	58	12.5	11	-	-	-	-	Omnivora
Liolaemus_fitzgeraldi	54.2662	11.5775	9.4575	19.4825	31.94	12.4575	25.7313	Insectivore
Liolaemus_fitzingerii	88.558	16.9496	14.4013	32.9576	50.6952	17.7376	41.5301	Omnivora
Liolaemus_fuscus	44.6702	9.47954	7.31336	14.7881	24.3729	9.58479	19.8296	Insectivore
Liolaemus_gallardoi	81.4511	16.315	13.8458	28.9171	43.5547	14.6376	38.3758	Omnivora
Liolaemus_goetschi	69.3507	13.833	11.2476	26.6678	41.0598	14.3922	32.0103	Insectivore
Liolaemus_gracilis	49.6802	10.0607	8.08345	17.3939	27.3244	9.93535	23.1522	Insectivore
Liolaemus_gravenhorstii	55.354	11.7749	9.0089	20.785	33.3812	12.5962	24.4277	Insectivore
Liolaemus_grosseorum	54.4936	11.2157	8.82643	20.3907	32.6229	12.2321	24.7236	Insectivore
Liolaemus_gununakuna	92.9	21.3	18	35	61.8	26.8	47.4	Insectivore
Liolaemus_hatcheri	60.5689	11.8225	10.8695	21.9217	32.1537	1.23231	29.1863	Herbivore
Liolaemus_heliodermis	75.6	16.7	15	-	-	-	-	Omnivora
Liolaemus_hellmichi	51.4347	11.6247	9.27368	19.5908	31.4439	11.8532	21.0813	Insectivore
Liolaemus_hermannunezi	58.7333	12.8444	10.9056	23.1783	37.2083	14.3	24.7789	Insectivore
Liolaemus_huacahuasicus	64.8659	13.413	11.9041	23.6027	34.1484	1.54571	29.5598	Herbivore
Liolaemus_inacayali	66.7	14.6	11.5	-	-	-	-	Insectivore
Liolaemus_insolitus	55.8929	12.631	11.9524	19.0262	28.1333	9.17143	26.4643	Insectivore
Liolaemus_irregularis	76.3415	15.8553	13.6059	27.3121	42.1408	14.8287	35.1769	Omnivora
Liolaemus_isabelae	73.1091	14.8883	12.7222	26.6388	41.8629	15.2244	34.8891	Insectivore
Liolaemus_janequeoae	59.1	13.1	10.5	21.1	36	14.9	21.8	Insectivore
Liolaemus_kingii	81.7019	16.1565	13.9385	28.5029	42.4847	13.9818	39.3783	Omnivora
Liolaemus_kolengh	59.6101	11.7615	10.9104	22.7978	33.066	1.26814	28.8149	Insectivore
Liolaemus_koslowskyi	58.4141	12.5242	10.705	23.8814	37.6347	13.7533	27.0363	Insectivore
Liolaemus_kriegi	88.1533	17.4971	15.4433	32.7091	48.0799	15.3785	40.9181	Omnivora
Liolaemus_laurenti	51.3935	10.7238	9.09846	20.1154	32.8035	12.6888	24.2588	Omnivora
Liolaemus_lavillai	57.4	12.7	10.8	-	-	-	-	Omnivora
Liolaemus_leftrarui	81.7	20.1	16.9	26.5	46	19.5	35.4	Insectivore
Liolaemus_lemniscatus	46.8876	9.81925	7.60606	15.6542	26.0129	1.35876	21.0947	Insectivore
Liolaemus_leopardinus	86.2386	18.5413	15.5715	33.5442	52.7388	19.1945	36.8635	Omnivora
Liolaemus_lineomaculatus	55.6521	11.2782	9.58771	20.6751	30.434	9.75889	25.7797	Omnivora
Liolaemus_loboi	72.6	15.3	11.7	-	-	-	-	Insectivore
Liolaemus_lorenzmuelleri	85.1303	17.005	14.4157	30.4106	46.9566	16.5467	41.3007	Insectivore
Liolaemus_lutzae	89	-	-	-	-	-	-	Omnivora
Liolaemus_magellanicus	57.3137	11.1427	9.43541	20.4195	30.5891	1.16969	27.6575	Omnivora
Liolaemus_maldonadae	76.8023	14.7833	12.0583	28.7764	43.7618	14.9855	34.3809	Insectivore
Liolaemus_mapuche	76.9	15.9	12.7	-	-	-	-	Insectivore
Liolaemus_martorii	64.8	13.6	10.3	-	-	-	-	Insectivore
Liolaemus_melaniceps	97.43	21.73	17.775	36.055	57.36	21.35	45.365	Omnivora
Liolaemus_melanops	77.0184	15.0116	12.262	29.2974	46.1621	16.8647	35.5308	Omnivora
Liolaemus_molinai	70.7	-	-	-	-	-	-	Herbivore
Liolaemus_monticola	59.6364	12.8031	10.4173	22.6822	38.1219	15.4397	26.0387	Insectivore
Liolaemus_morenoi	75.21	14.96	11.6167	29.12	46.1633	17.4333	33.46	Omnivora
Liolaemus_multicolor	71.0415	15.5017	12.6985	26.845	40.5162	13.6712	31.4586	Omnivora
Liolaemus_multimaculatus	56.8485	13.0269	10.8597	22.5317	33.8777	11.3463	25.6974	Insectivore
Liolaemus_neuquensis	59.6595	11.8078	10.4158	23.454	34.7676	11.3136	27.3882	Omnivora
Liolaemus_nigrocoeruleus	56.1	15.4	10.1	-	-	-	-	Insectivore
Liolaemus_nigromaculatus	66.1345	14.305	11.7744	24.5557	38.8966	14.3487	31.5323	Omnivora
Liolaemus_nigroviridis	67.5663	14.0835	11.5809	24.2342	38.1965	13.9623	29.873	Omnivora
Liolaemus_nitidus	87.6146	18.0075	15.0631	30.9676	50.4778	19.5119	39.3671	Omnivora
Liolaemus_occipitalis	52	13	9.5	-	-	-	-	Omnivora
Liolaemus_olongasta	67	-	-	-	-	-	-	Omnivora
Liolaemus_orientalis	100	-	-	-	-	-	-	Herbivore
Liolaemus_ornatus	64.0636	13.2877	11.4187	23.5943	37.0127	13.4184	28.8888	Omnivora
Liolaemus_pagaburoi	49.35	9.94	8.1	16.74	26.27	9.53	21.71	Omnivora
Liolaemus_parvus	62.8758	13.4069	10.765	24.8612	39.9485	15.8738	27.9335	Insectivore
Liolaemus_paulinae	52.8299	10.6642	8.65265	19.3968	31.0628	11.666	24.2333	Insectivore
Liolaemus_petrophilus	88.1812	18.9715	15.2202	33.8059	53.7461	19.942	37.9197	Insectivore
Liolaemus_pictus	61.8534	13.6975	11.1337	25.4523	38.4979	13.4555	27.7278	Omnivora
Liolaemus_platei	50.1591	11.1165	8.86445	19.0538	31.3918	12.338	22.1272	Insectivore
Liolaemus_poconchilensis	53.68	12.8075	11.7613	23.9025	35.2138	11.3113	22.245	Insectivore
Liolaemus_poecilochromus	76.1	-	-	-	-	-	-	Herbivore
Liolaemus_polystictus	76	22	20	-	-	-	-	Herbivore
Liolaemus_pseudoanomalus	58.665	12.8963	12.9769	23.1175	34.175	11.575	24.835	Insectivore
Liolaemus_pseudolemniscatus	46.945	10.205	7.715	16.395	28.5	12.15	20.65	Insectivore
Liolaemus_puna	47.6138	9.60875	7.7375	17.5138	27.0938	9.58	21.0887	Omnivora
Liolaemus_punmahuida	96.2	18.6	17.3	-	-	-	-	Omnivora
Liolaemus_quilmes	56.1758	12.2243	10.2505	22.593	36.0176	13.4246	25.2495	Insectivore
Liolaemus_ramirezae	48.9	9.8	8.1	-	-	-	-	Omnivora
Liolaemus_riojanus	53.4351	12.5063	10.7129	21.8971	33.5908	11.6938	24.5162	Insectivore
Liolaemus_robertmertensi	51.85	10.52	8.3875	19.495	31.7475	12.2525	25.615	Insectivore
Liolaemus_rothi	88.8814	18.3145	15.7938	32.8172	51.5224	18.7519	39.9675	Insectivore
Liolaemus_ruibali	55.9126	11.7814	9.82662	21.5693	32.3936	1.82425	25.0819	Omnivora
Liolaemus_sagei	72.7526	14.8025	12.4246	26.9224	41.508	14.5856	33.6404	Insectivore
Liolaemus_salinicola	60.4175	13.615	10.79	23.525	36.2825	12.7575	27.66	Insectivore
Liolaemus_sarmientoi	81.475	16.1728	13.5259	27.2062	41.6815	14.4753	39.5004	Omnivora
Liolaemus_saxatilis	51.6394	11.07	8.09617	18.456	28.2522	9.79617	22.914	Insectivore
Liolaemus_scapularis	58.961	13.2986	10.724	23.0162	34.877	11.8675	26.0967	Insectivore
Liolaemus_schroederi	56.7198	12.0027	9.47397	22.4415	35.3663	12.9248	25.8017	Insectivore
Liolaemus_scorialis	62.3	16.4	11.4	21.1	39.7	18.6	26.3	Omnivora
Liolaemus_senguer	57.4	12.6	9.3	-	-	-	-	Insectivore
Liolaemus_septentrionalis	59.5	-	-	-	-	-	-	Insectivore
Liolaemus_signifer	69	15.5	12	-	-	-	-	Omnivora
Liolaemus_silvai	58.8767	11.07	8.02167	21.24	32.85	11.61	27.6725	Insectivore
Liolaemus_silvanae	68.5786	13.1349	12.1894	27.7954	40.4698	12.6744	31.9648	Herbivore
Liolaemus_sitesi	76.1	16.3	16.3	-	-	-	-	Omnivora
Liolaemus_somuncurae	81.5531	16.6919	14.2214	29.4484	42.7195	13.2719	37.8725	Insectivore
Liolaemus_stolzmanni	54.099	12.5553	11.509	25.4527	35.1463	9.69367	22.895	Insectivore
Liolaemus_tari	86.7716	17.7628	15.2416	30.6123	46.2276	15.6152	41.4693	Insectivore
Liolaemus_tehuelche	72.1	15.4	11.5	-	-	-	-	Insectivore
Liolaemus_telsen	62.2366	12.5835	10.2558	23.2617	37.1151	13.8534	28.0332	Insectivore
Liolaemus_tenuis	54.8277	12.2296	9.84563	22.0227	34.7667	12.744	24.0807	Insectivore
Liolaemus_torresi	58.48	13.3912	10.9213	28.3438	40.735	12.3912	24.6638	Insectivore
Liolaemus_tregenzai	77.9455	15.834	13.9525	30.28	44.8595	14.5795	35.512	Herbivore
Liolaemus_tristis	75.182	15.3373	13.0224	26.3452	39.549	13.2387	36.0645	Insectivore
Liolaemus_umbrifer	88.8	19.2	15.9	-	-	-	-	Omnivora
Liolaemus_uniformis	84.7	22.1	15.8	25.7	46.1	2.4	34.9	Omnivora
Liolaemus_uptoni	86.5	20	18	26.5	44	17.5	37	Insectivore
Liolaemus_uspallatensis	56.37	12.2595	10.078	23.9645	38.0572	14.9267	24.7172	Insectivore
Liolaemus_valdesianus	86.4445	18.4633	15.821	32.9772	53.2287	2.25154	37.2519	Omnivora
Liolaemus_vallecurensis	61.5258	13.26	10.9917	24.0425	34.5742	1.53167	27.88	Omnivora
Liolaemus_velosoi	48.2952	10.7212	8.65982	18.5949	30.3687	11.7739	21.1866	Insectivore
Liolaemus_villaricensis	65.2805	-	-	-	-	-	-	Herbivore
Liolaemus_walkeri	52.155	10.7287	9.0325	17.9213	27.1375	9.21625	24.1121	Omnivora
Liolaemus_wiegmannii	52.7521	11.3596	9.2084	19.9356	30.2346	1.29922	23.934	Insectivore
Liolaemus_xanthoviridis	82.3336	15.6835	12.8303	30.8954	47.3591	16.4637	38.7399	Omnivora
Liolaemus_yanalcu	50.5	11.1	9.5	-	-	-	-	Insectivore
Liolaemus_zabalai	90.3	22.2	16.5	28.5	47.1	18.6	39.7	Omnivora
Liolaemus_zapallarensis	82.9587	17.4438	14.4755	30.3316	46.3316	16.6767	37.8137	Omnivora
Liolaemus_zullyae	70.8469	14.5623	11.9183	25.233	38.0111	12.7781	32.8818	Insectivore
Phymaturus_aguedae	94.2	21.4	19.6	32.6	50.6	18	45.7	Herbivore
Phymaturus_antofagastensis	91.7228	19.68	18.59	-	-	-	-	Herbivore
Phymaturus_bibronii	99.325	19.3446	19.4821	40.7536	51.7786	11.25	52.3446	Herbivore
Phymaturus_calcogaster	84.9	15.55	14.2825	30.455	44.4075	13.9525	45.2775	Herbivore
Phymaturus_ceii	86.3333	17.2528	15.7333	30.6639	46.7986	16.1347	45.7722	Herbivore
Phymaturus_delheyi	89.5	15.7	15	-	-	-	-	Omnivora
Phymaturus_denotatus	94.4	15.5	15.9	-	-	-	-	Herbivore
Phymaturus_dorsimaculatus	92.6	16.2	16.8	-	-	-	-	Herbivore
Phymaturus_extrilidus	98.5	16.9	17.2	-	-	-	-	Herbivore
Phymaturus_indistinctus	85.825	16.955	15.34	31.04	46.05	15.1	43.24	Omnivora
Phymaturus_mallimaccii	87	16	16.5	31	45.5	14.5	45.5	Herbivore
Phymaturus_manuelae	89.11	18.3633	16.35	33.9067	47.1867	13.28	48.59	Herbivore
Phymaturus_maulense	92.0857	19.8286	19.2167	38.2333	48.9857	1.75239	45.7405	Herbivore
Phymaturus_nevadoi	88.2536	14.4634	14.0876	-	-	-	-	Herbivore
Phymaturus_palluma	95.882	17.7317	19.2515	32.8005	42.5234	9.72286	47.3947	Herbivore
Phymaturus_patagonicus	86.3723	16.0286	15.5718	32.4491	47.8318	15.3827	43.8359	Herbivore
Phymaturus_payuniae	84.7083	16.4667	14.825	-	-	-	-	Herbivore
Phymaturus_punae	100.815	18.7214	18.3274	35.7988	47.6905	11.8917	59.4214	Herbivore
Phymaturus_roigorum	101.5	20.3	20.9	-	-	-	-	Herbivore
Phymaturus_sitesi	91.1	16.1	15.1	-	-	-	-	Herbivore
Phymaturus_somuncurensis	91.654	16.2995	15.7635	31.505	44.059	12.554	45.196	Herbivore
Phymaturus_spurcus	84.0721	16.4754	14.7835	30.4778	44.9117	14.434	43.9438	Herbivore
Phymaturus_tenebrosus	90.6444	16.8528	16.5556	32.7722	48.3806	15.6833	48.4	Herbivore
Phymaturus_verdugo	103.669	18.6187	20.3477	36.7204	46.5127	9.79232	53.1486	Herbivore
Phymaturus_videlai	79.275	16.9542	14.8875	28.7792	40.6458	11.8667	43.7542	Herbivore
Phymaturus_vociferator	92.9895	18.7241	18.6025	34.8791	46.9533	12.7413	48.5492	Herbivore
Phymaturus_williamsi	103	18.4	18.2	-	-	-	-	Herbivore
Phymaturus_zapalensis	86	17	16.5	-	-	-	-	Omnivora
